# Supplementary material
Source: publisher figshare collection journal article supplement (https://rs.figshare.com/ndownloader/files/14015765)
Supplement: Supplementary file 1 [file 14015765]

## Sheet: Sheet1
C. horei	M. zebra	S. multipunctatus	S. lucipinnis
4.82	4.3	2.94	1.5
4.75	4.15	2.85	1.5
4.58	4.15	2.79	1.5
4.92	4.14	2.65
4.67	4.26	2.86
4.97	4.21	3.03
4.55	4.2	2.81
4.78	4.14	2.89
4.74	4.12	2.84
4.81	4.18	2.78
4.98	4.18	2.79
4.89	4.43	2.73
5	4.19	2.81
4.78	4.01	2.72
4.93	3.98	2.65
4.87	3.99	2.76
4.79	4.07	2.78
4.43	4.27	2.75
4.55	3.87	2.81
4.78	4.35	2.69
4.79	3.88	2.77
4.7	3.98	2.76
4.85	4.33	2.52
4.9	4.25	2.8
5.05	4.03	2.66
4.82	4.4	2.62
4.52	4.24	2.76
5.18	4.04	2.83
4.99	4.22	2.58
4.98	4.15
4.96	4
4.6	3.97
4.52	4.01
4.4	4.2
4.6	4.07
4.4	4.33
4.89	4.37
4.66	4.34
4.66	4.21
4.79	4.23
4.45	4.2
4.93	4.21
4.6	4.23
4.44	4.2
4.95	4.21
4.62	4.23
4.59	4.2
4.81	4.21
4.83	3.89
4.57	4.07
4.73	4.37
4.57	4.54
4.54	4.54
5.16	4.41
4.99	4.51
4.88	4.65
5.02	4.79
4.98	4.58
4.9	4.59
5.21	4.66
5.02	4.57
4.74	4.63
4.98	4.58
4.89	4.58
4.75	4.38
4.91	4.46
4.9	4.66
4.81	4.51
4.71	4.48
4.73	4.78
4.5	4.67
4.52	4.63
5.17	4.48
5.01	4.3
4.96	4.59
4.96	4.61
4.86	4.64
4.42	4.48
4.51	4.54
4.62	4.55
4.84	4.59
4.73	4.63
4.75	4.67
4.5	4.42
4.55	4.61
4.82	4.45
4.67	4.55
4.45	4.45
4.71	4.64
4.88	4.47
4.47	4.51
4.64	4.72
4.78	4.51
4.62	4.78
4.68	4.67
4.73	4.6
4.56	4.53
4.42	4.64
4.47	4.34
4.49
4.52
4.86
4.89
4.65
4.62
4.57
4.54
4.87
4.61
4.55
4.59
4.61
4.62
4.73
4.64
4.93
5
4.53
4.57
4.69
4.6
4.71
4.77
4.7
4.91
4.62
4.75
4.45
4.75
4.95
4.66
4.52
4.47
4.76
4.82
4.58
4.75
4.67
4.68
4.69
